# Supplementary material for: ChREBP Mediates Glucose-Stimulated Pancreatic β-Cell Proliferation
Source: PubMed Central journal article supplement — Diabetes. 2012 Jul 17;61(8):2004–15. doi: 10.2337/db11-0802 (PMC3402328; doi:10.2337/db11-0802), 2012-07-17

SUPPLEMENTARY DATA

**Supplementary Table 1.** Primers for gene expression

| <b>Gene name</b> | <b>Forward primer</b>  | <b>Reverse primer</b> |
|------------------|------------------------|-----------------------|
| $\beta$ -actin   | AACACCCCAGCCATGTACGTAG | GAACCGCTCATTGCCGATAGT |
| Pklr             | GTGGAGCACGGTGGTATCTT   | CTTCACGCCTTCATGGTTCT  |
| Acaca            | TACAACGCAGGCATCAGAAG   | TGTGCTGCAGGAAGATTGAC  |
| c-Myc            | CGAGCTGAAGCGTAGCTTTT   | CTCGCCGTTTCCTCAGTAAG  |
| Mlxipl           | GGCTGTTGTCTTGGAGGGTA   | AGAAGAGCTGTTCCGCACCAT |
| Ccnd1            | GCGTACCCTGACACCAATCT   | GGCTCCAGAGACAAGAAACG  |
| Ccnd2            | TTACCTGGACCGTTTCTTGG   | TGCTCAATGAAGTCGTGAGG  |
| Ccne1            | GACAGCTAGCGCGGTGTAG    | GTTGCTGTGGTCCTTCGAGT  |
| Ccna2            | GAATGAGACCCTGCATTTGG   | GGTGCTCCATTCTCAGAACC  |
| Cdk1             | CCGAAATCTGCCAGTTTGAT   | CTGGCCAGTTCATGGATTCT  |
| Cdk2             | CATTCCTCTTCCCCTCATCA   | GTACGGACAGGGACTCCAAA  |
| Cdk4             | TATGAACCCGTGGCTGAAAT   | CATCAGCCGTACAACATTGG  |
| Cdk6             | CAACGTGGTCAGGTTGTTTG   | TCGGAGAAGCTGAAACATCA  |
| p21              | CTTGTCGCTGTCTTGCACTC   | AGGCAGAAGATGGGGAAGAG  |
| p27              | TTGCGCAATTAGGTTTTTCC   | AAAGGAATTCAAGCCCTTCC  |
| p57              | CGAGAATCAGGAGCTGAAGG   | CAGGAGCCACGTTAGGAGAG  |
| p15              | TCACCAGACCTGTGCATGAT   | AGATAGGGCTGGGGAGAAAA  |
| p18              | GTTGAGGGCTTCAGAACTGC   | CAGTGGTGACTTGAGGCAGA  |
| p19              | CACCGGTAGCCACTATGCTT   | TGCTGGACTTCCAAACATCA  |
| ACTB             | GGCATCCTCACCTGAAGTA    | GGGGTGTTGAAGGTCTCAA   |
| MLXIPL           | AGAGACAAGATCCGCCTGAA   | ACTTGTGGTATTCCCGCATC  |

SUPPLEMENTARY DATA

**Supplementary Table 2.** Expression of cell cycle regulatory genes in isolated rat islet cells. Dispersed rat islet cells were transduced with an adenovirus expressing either GFP or ChREBP and cultured in 20 mM glucose under conditions identical to those depicted in Figure 6. Values for mRNA are mean of  $\Delta\Delta\text{CT}$  normalized to beta actin from four independent experiments, with cell cycle accelerators listed above cell cycle brakes, separated by a double line. For clarity, values were multiplied by 100, except for ChREBP, CcnD2, Cdk4, and p21. \*,  $p < 0.05$ .

|        | 20 mM Ad-GFP   | 20 mM Ad-ChREBP |
|--------|----------------|-----------------|
| ChREBP | 0.03 ± .002    | 0.89 ± .02 *    |
| Ccna2  | 0.29 ± .01     | 0.47 ± .07 *    |
| Ccne1  | 0.052 ± .004   | 0.013 ± .002*   |
| Ccnd2  | 0.31 ± .02     | 0.33 ± .02      |
| Cdk1   | 0.15 ± .01     | 0.20 ± .03 *    |
| Cdk2   | 0.5 ± .03      | 0.07 ± .03*     |
| Cdk4   | 0.17 ± .02     | 0.14 ± .01      |
| Cdk6   | 0.79 ± .1      | 0.11 ± .02*     |
| c-Myc  | 0.25 ± .01     | 0.30 ± .03*     |
| p21    | 0.026 ± .007   | 0.0087 ± .0006  |
| p27    | 0.0017 ± .0004 | 0.0036 ± .0006* |
| p57    | 0.082 ± .006   | 0.061 ± .005*   |
| p15    | 0.45 ± .05     | 0.32 ± .02      |
| p18    | 0.43 ± .03     | 0.32 ± .01 *    |
| p19    | 0.50 ± .04     | 0.33 ± .04*     |

SUPPLEMENTARY DATA

**Supplementary Figure 1.** Immunostaining of human islets after depletion or overexpression of ChREBP. (A) Dispersed human islets cells treated with Accell siRNA were cultured on coverslips in either 5.5 mM or 20 mM glucose for 72 h. BrdU was added for the last 48 h. Cells were fixed and stained with anti-insulin (green) and BrdU (red) antibodies, and nuclei were stained with DAPI (blue) (B). Dispersed human islet cells were transduced with adenovirus expressing ChREBP or GFP and were treated exactly as described for isolated rat islet cells in Figure 6, except BrdU was added 48 h prior to the end of the experiment. Cells were counted in a blinded fashion and the results are presented in Figure 8.

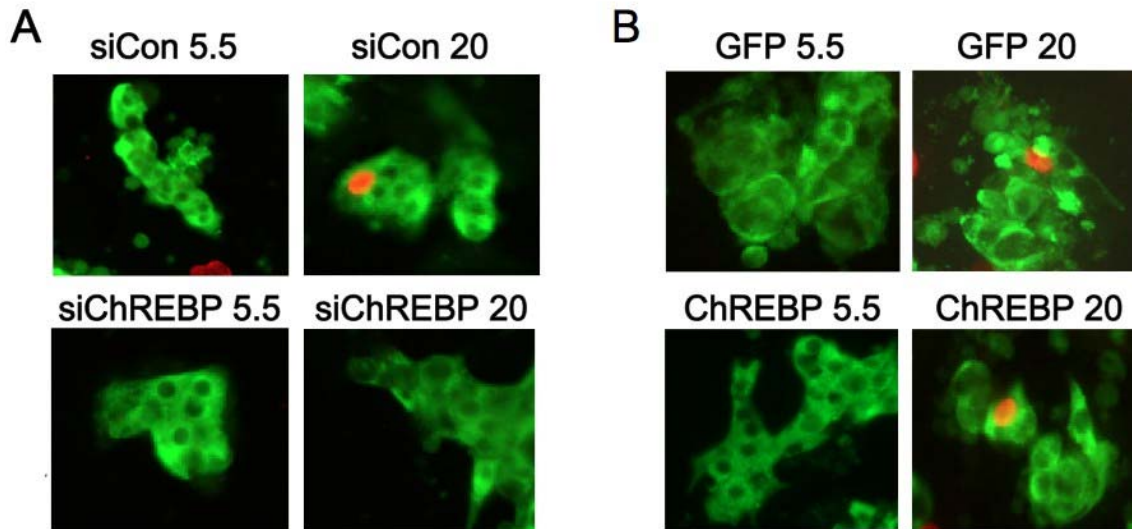

Supplement: supp_db11-0802_DB110802SupplementaryData.pdf [file supp_db11-0802_DB110802SupplementaryData.pdf]
